# Supplementary material
Source: PubMed Central journal article supplement (PMC1458860)

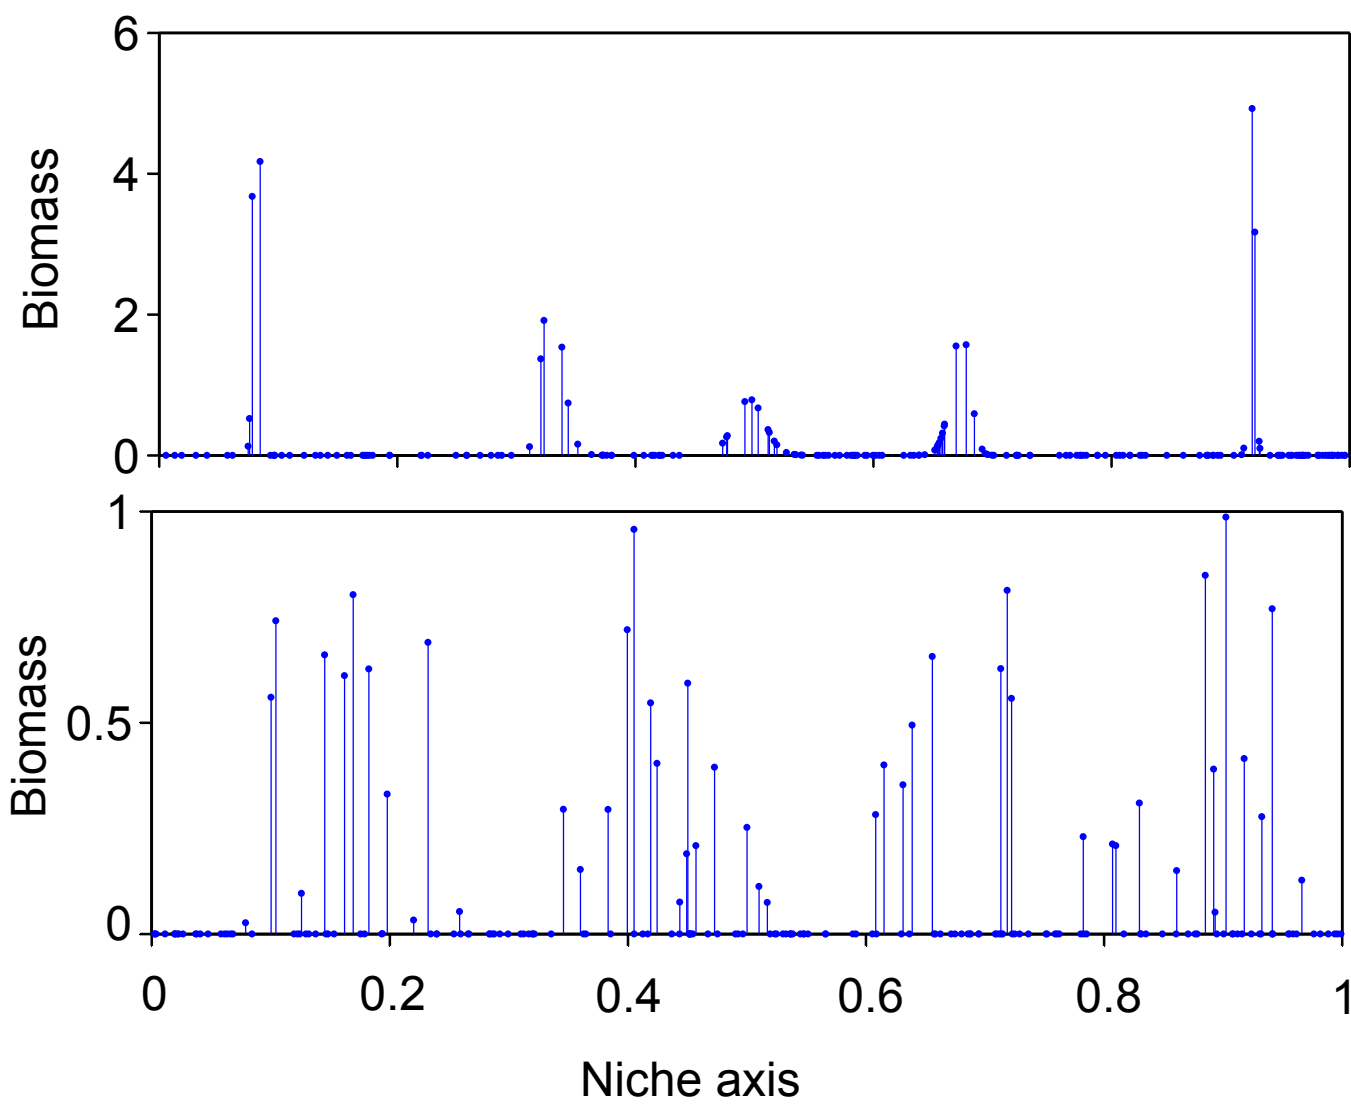

Supplement: pnas_0508024103_1.pdf [file pnas_0508024103_1.pdf]

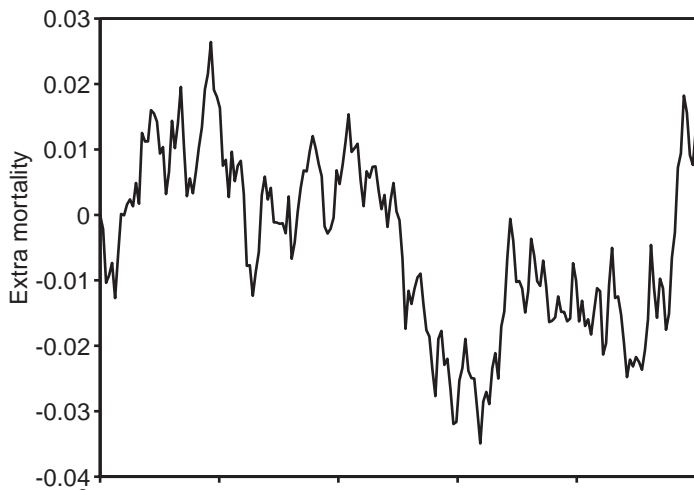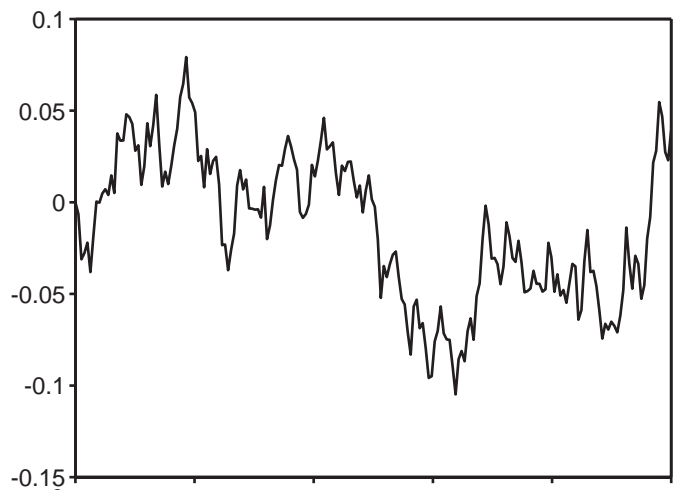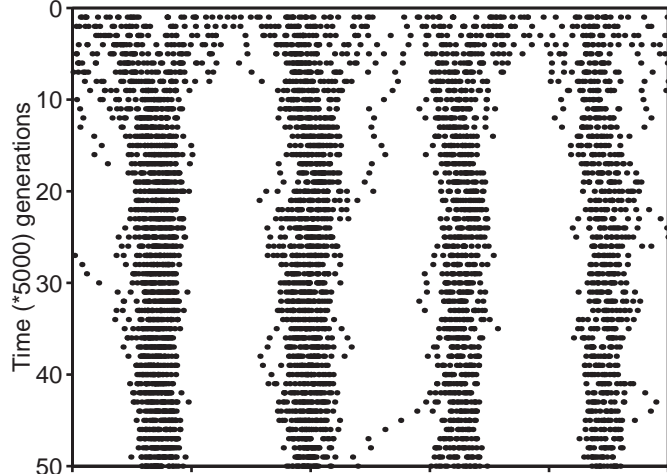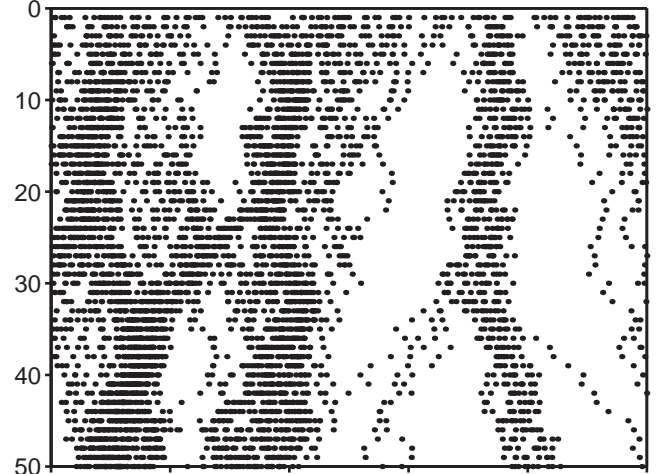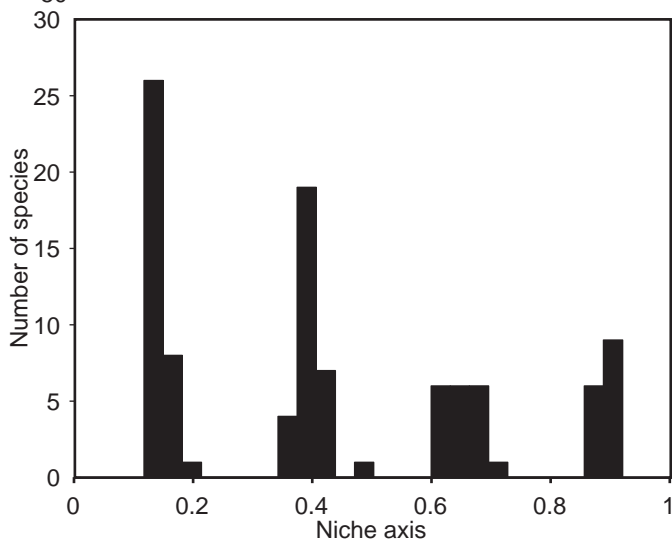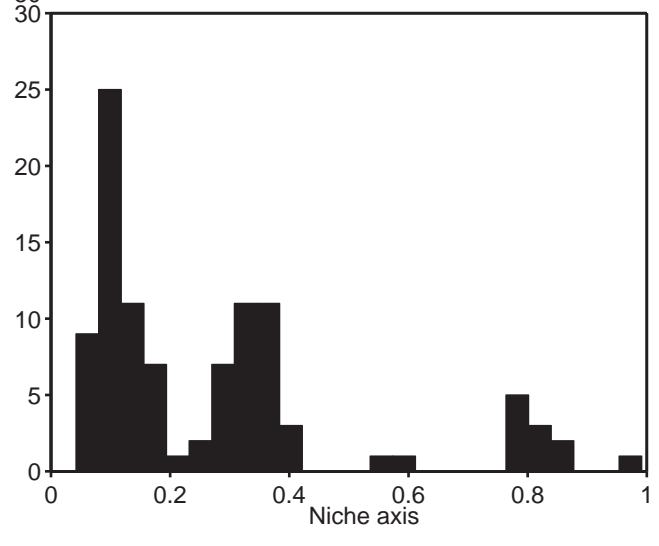

Supplement: pnas_0508024103_2.pdf [file pnas_0508024103_2.pdf]
